# Supplementary material for: Prevalence and Parental Risk Factors for Speech Disability Associated with Cleft Palate in Chinese Children—A National Survey
Source: Int J Environ Res Public Health. 2016 Nov 23;13(11):1168. doi: 10.3390/ijerph13111168 (PMC5129378; doi:10.3390/ijerph13111168)
Supplement: Supplementary file 1 [file ijerph-13-01168-s001.xlsx]

## Sheet: Sheet1
Table S1 Studies on the prevalence of oral cleft in China
Reference	Publish time	Period	Research area	Data source	Subject	Number						Prevalence(per10,000 people）							RR(urban/rural rate ratio)	Death rate	Gender ratio(male/female)						RR(male/female rate ratio)						Does the following factors have significant influence on the prevalence of oral cleft?					Heritability(by Falconer's formula)
						Sample size	Total	CL	CLP	CP	Associated Anomalies	Total	CL	CLP	CP	Associated Anomalies	Urban	Rural			Total	CL	CLP	CP	Associated Anomalies		Total	CL	CLP	CP	Associated Anomalies		Family history	Mother age	Mother education level	Father age	Father education level
Hu et al [1]	1982	1972-1982	Shanghai	Hospital records	Newborns and patients	45072	60	-	-	-	-	13.3	-	-	-	-	-	-	-	-	-	-	-	-	-		-	-	-	-	-		Yes	-	-			0.776
Shi et al [2]	1989	1985-1987	Anhui	Hospital records	Livebirth or stillbirth	46811	116	39	66	11	-	24.78	8.3	14.09	2.34	-	16.7	40.9	0.41	-	1.09(60/55)	1.05(20/19)	1.41(33/27)	0.22(2/9)	-		-	-	-	-	-		Yes	Yes	Yes	-	-	0.596
Xiao et al [3]	1989	1986-1987	Mainland China	Birth defect surveillance	Fetuses and newborns in the perinatal period	1243284	2265	690	1390	185	418（Dead fetuses 95，stillbirth 79，livebirth 244）	18.2179	5.54982	11.1801	1.48799	3.36206	16.9	20.8	0.81	11.8%(Dead fetuses 7.3%，stillbirth 4.5%)	1.31(1280/975)	-	-	-	-		1.22(19.8/16.3)	-	-	-	-		-	-	-	-	-	-
Marazita et al [4]	1992	1980-1987	Shanghai	Hospital records	Livebirth	250372	279	-	-	-	-	11.1	-	-	-	-	-	-	-	-	1.42	1.58	1.35	-	-		-	-	-	-	-		Yes	-	-	-	-	-
Wu et al [5]	1995	1988-1991	Mainland China	Birth defect surveillance	Fetuses and newborns in the perinatal period	2750588	4548	3854		694	-	16.5	14		2.5	-	16.7	16	1.04	-	1.33	1.46		0.8	-		1.23(17.9/14.6)	1.34(15.8/11.8)		0.72(2.1/2.9)	-		-	-	-	-	-	-
Chen et al [6]	1998	1986-1992	Fujian	Hospital records	Livebirth or stillbirth	139882	204	61	115	28	28	14.6	4.3	8.2	2	2.00169	-	-	-	-	-	1.65(38/23)	1.35(66/49)	0.75(12/16)			-	-	-	-	-		-	-	-	-	-	-
Cooper et al [7]	2000	1980-1989	Shanghai	Hospital records	Livebirth	541504	643	-	-	-	-	12	-	-	-	-	-	-	-	-	1.4(308/220)	1.42(108/76)	1.39(200/144)	-	-		-	-	-	-	-		-	Yes	-	-	-	-
Liang et al [8]	2000	1988-1992	Mainland China	Birth defect surveillance	Fetuses and newborns in the perinatal period	3246408	4349	1244	2522	583	-	13.4	3.8	7.8	1.8	-	13.7	12.7	1.08	-	1.38(2516/1824)	-	-	-	-		1.27(14.9/11.7)	-	-	-	-		-	-	-	-	-	-
Liang et al [9]	2000	1988-1992	Mainland China	Birth defect surveillance	Fetuses and newborns in the perinatal period	3246408	3766	1244	2522	-	-	11.6	3.8	7.8	-	-	11.7	11.4	1.03	13%(Dead fetuses 3.5%，stillbirth 1.5%,dead with 7 days 8%)	1.56(2288/1470)	1.44(732/509)	1.62(1556/961)	-	-		1.40(13.3/9.5)	1.30(4.3/3.3)	1.48(9.2/6.2)	-	-		-	-	-	-	-	-
Dai et al [10]	2003	1996-2000	Mainland China	Birth defect surveillance	Fetuses and newborns in the perinatal period	2218616	3106	1115	1991	-	-	14	5.03	8.97	-	-	13.28	15.57	0.85	-	1.59(1888/1189)	1.56(674/433)	1.61(1214/756)	-	-		1.41(16.06/11.4)	1.38(5.73/4.15)	1.43(10.33/7.25)	-	-		-	Yes	-	-	-	-
Dai et al [11]	2004	1996-2001	Mainland China	Birth defect surveillance	Fetuses and newborns in the perinatal period	2218616	499	-	-	499	-		-	-	2.25	-	2.27	2.19	1.03653	0.149	-	-	-	0.85	-		-	-	-	0.75(1.93/2.57)	-		-	-	-	-	-	-
Li et al [12]	2008	2003-2004	Shanxi	Birth defect surveillance	Fetuses and newborns in the perinatal period	25355	83	21	44	6	12	32.7	8.3	17.4	2.4	4.7	28	28.2	0.99	14.4%(Stillbirth 3.6%,termination 10.8%)	1.13(44/39)	1.33(12/9)	1.59(27/17)	0.50(2/4)	0.33(3/9)		1.04(3.35/3.22)	1.23(9.1/7.4)	1.46(20.5/14.1)	0.46(1.5/3.3)	0.31(0.24/0.74)		-	Yes	Yes	-	-	-
Wang et al [13]	2009	2000-2007	Shenyang	Birth defect surveillance	Fetuses and newborns in the perinatal period	360990	634	166	372	96	-	17.6	4.6	10.3	2.7	-	-	-	-	-	2.02(424/210)	1.86(108/58)	2.88(276/96)	0.71(40/56)	-		-	-	-	-	-		-	No	No	No	No	-
Dai et al [14]	2010	1996-2005	Mainland China	Birth defect surveillance	Fetuses and newborns in the perinatal period	4891472	8133	2553	4325	1255	1172	16.63	5.22	8.84	2.57	2.4	13.57	15.61	0.87	-	1.41(4061/2873)	1.58(1378/872)	1.64(2304/1406)	0.64(379/595)	1.27(623/492)		1.25(15.64/12.53)	1.40(5.31/3.8)	1.41(8.87/6.31)	0.56(1.46/2.59)	1.12(2.4/2.15)		-	Yes	-	-	-	-
Fu et al [15]	2015	2006-2012	Jiangxi	Birth defect surveillance	Fetuses and newborns in the perinatal period	465955	643	248	314	81	68	13.8	5.3224	6.73885	1.73837	1.45937	11.77	16.01	0.74	0.222	1.8(413/229)	-	-	-	-		1.49(16.2/10.85)	1.61(6.39/3.98)	1.74(8.35/4.79)	0.69(1.45/2.09)	-		-	yes	-	-	-	-
Perinatal period: From 28 weeks of gestation to 7 days after births.
Reference
[1] Hu, D. N., Li, J. H., Chen, H. Y., Chang, H. S., Wu, B. X., Lu, Z. K., Wang, D. Z., and Liu, X. G. (1982) Genetics of cleft lip and cleft palate in China, American journal of human genetics 34, 999-1002.
[2] Shi, M., Wu, X., and Chen, Y. (1989) [Genetic epidemiological investigation of cleft lip and cleft palate], Zhonghua liu xing bing xue za zhi = Zhonghua liuxingbingxue zazhi 10, 154-157.
[3] Xiao, K., Zhang, z., Li, J., and Yu, T. (1989) [Epidemiology of cleft lip and cleft palate in China], Zhonghua Yi Xue Za Zhi 69, 192-194.
[4] Marazita, M. L., Hu, D. N., Spence, M. A., Liu, Y. E., and Melnick, M. (1992) Cleft lip with or without cleft palate in Shanghai, China: evidence for an autosomal major locus, American journal of human genetics 51, 648-653
[5] Wu, Y., Zeng, M., Xu, C., Liang, J., Wang, Y., Miao, L., and Xiao, K. (1995) [Analyses of the prevalences for neural tube defects and cleft lip and palate in China from 1988 to 1991], Hua Xi Yi Ke Da Xue Xue Bao 26, 215-219.
[6] Chen, S., Chen, J., and He, L. (1998) [An epidemiological survey of cleft lip and cleft palate in Fujian province], Zhonghua kou qiang yi xue za zhi = Zhonghua kouqiang yixue zazhi = Chinese journal of stomatology 33, 33-35.
[7] Cooper, M. E., Stone, R. A., Liu, Y., Hu, D. N., Melnick, M., and Marazita, M. L. (2000) Descriptive epidemiology of nonsyndromic cleft lip with or without cleft palate in Shanghai, China, from 1980 to 1989, The Cleft palate-craniofacial journal : official publication of the American Cleft Palate-Craniofacial Association 37, 274-280.
[8] Liang, J., Wang, Y., Guangxuan, Z., and Zhu, J. (2000) [Dynamic variation of incidence of nonsyndromic cleft lip with or without cleft palate during 1988 to 1992 in China], Journal of Oral and Maxillofacial Surgery 10, 299-301.
[9] Liang, J., Wang, Y., Miao, L., and Zhu, J. (2000) [Nonsyndromic cleft lip with or without cleft palate in Chinese population:analysis of 3766 cases], Hua Xi Yi Ke Da Xue Xue Bao 31, 408-410.
[10] Dai, L., Zhu, J., Zhou, G. X., Wang, Y. P., and Miao, L. (2003) [The monitoring of cleft lip with or without cleft palate in China: 1996 - 2000], Zhonghua kou qiang yi xue za zhi = Zhonghua kouqiang yixue zazhi = Chinese journal of stomatology 38, 438-440.
[11] Dai, L., Miao, L., Zhou, G. X., Zhu, J., and Li, G. (2004) [The prevalence analysis of cleft palate in Chinese perinatals: 1996-2000], Hua xi kou qiang yi xue za zhi = Huaxi kouqiang yixue zazhi = West China journal of stomatology 22, 35-37.
[12] Li, Z., Ren, A., Liu, J., Zhang, L., Ye, R., Li, S., and Li, Z. (2008) High prevalence of orofacial clefts in Shanxi Province in northern China, 2003-2004, American journal of medical genetics. Part A 146A, 2637-2643.
[13] Wang, W., Guan, P., Xu, W., and Zhou, B. (2009) Risk factors for oral clefts: a population-based case-control study in Shenyang, China, Paediatric and perinatal epidemiology 23, 310-320.
[14] Dai, L., Zhu, J., Mao, M., Li, Y., Deng, Y., Wang, Y., Liang, J., Tang, L., Wang, H., Kilfoy, B. A., Zheng, T., and Zhang, Y. (2010) Time trends in oral clefts in Chinese newborns: data from the Chinese National Birth Defects Monitoring Network, Birth defects research. Part A, Clinical and molecular teratology 88, 41-47.
[15] Fu, S., Huang, H., and Linling, H. (2015) [Epidemiological study of cleft lip and palate in Jiangxi Province, 2006-2012], Modern Preventive Medicine 42, 822-824.
